# Supplementary material for: Comparison of 3 Safety-Net Hospital Definitions and Association With Hospital Characteristics
Source: PubMed Central journal article supplement (PMC6686776; doi:10.1001/jamanetworkopen.2019.8577), 2019-08-07
Supplement: jamanetwopen-2-e198577-s001.pdf [file jamanetwopen-2-e198577-s001.pdf]

## Supplementary Online Content

Popescu I, Fingar KR, Cutler E, Guo J, Jiang HJ. Comparison of 3 safety-net hospital definitions and association with hospital characteristics. *JAMA Netw Open*. 2019;2(8):e198577. doi:10.1001/jamanetworkopen.2019.8577

### **eTable. Characteristics of Critical-Access Hospitals (CAHs)**

This supplementary material has been provided by the authors to give readers additional information about their work.

**eTable. Characteristics of Critical-Access Hospitals (CAHs)<sup>a,b</sup>**

| Characteristic                                               | Hospitals (N = 888), % |
|--------------------------------------------------------------|------------------------|
| <b>Institutional characteristics, % of CAHs</b>              |                        |
| Ownership                                                    |                        |
| Public                                                       | 39.8                   |
| Private, nonprofit                                           | 56.2                   |
| Private, for profit                                          | 4.1                    |
| Bed size                                                     |                        |
| 6-99 beds                                                    | 94.6                   |
| 100-299 beds                                                 | 5.4                    |
| 300+ beds                                                    | 0.0                    |
| Teaching hospital                                            | 2.7                    |
| System affiliated                                            | 48.6                   |
| Location                                                     |                        |
| Large metropolitan                                           | 4.7                    |
| Small metropolitan                                           | 13.4                   |
| Micropolitan                                                 | 17.3                   |
| Rural (noncore)                                              | 64.5                   |
| Region                                                       |                        |
| Northeast                                                    | 4.3                    |
| Midwest                                                      | 53.4                   |
| South                                                        | 25.5                   |
| West                                                         | 16.9                   |
| <b>Select hospital services, %</b>                           |                        |
| Alcohol/drug abuse outpatient                                | 2.4                    |
| Alzheimer's center                                           | 3.4                    |
| Services for older adults                                    | 31.6                   |
| HIV/AIDS                                                     | 2.9                    |
| Indigent care clinic                                         | 10.1                   |
| Neonatal intensive care unit                                 | 1.5                    |
| Psychiatric acute care unit                                  | 6.3                    |
| Psychiatric outpatient                                       | 14.6                   |
| Psychiatric emergency services                               | 12.0                   |
| Trauma center                                                | 41.9                   |
| <b>Patient characteristics, mean % of discharges at CAHs</b> |                        |
| Racial/ethnic minority                                       | 12.1                   |
| Community income                                             |                        |
| Quartile 1 (lowest)                                          | 34.0                   |
| Quartile 2                                                   | 39.6                   |
| Quartile 3                                                   | 21.6                   |
| Quartile 4 (highest)                                         | 4.8                    |

| Characteristic                                                          | Hospitals (N = 888), % |
|-------------------------------------------------------------------------|------------------------|
| Service line                                                            |                        |
| Maternal/neonatal                                                       | 12.3                   |
| Mental health                                                           | 2.4                    |
| Injury                                                                  | 3.4                    |
| Surgical                                                                | 5.4                    |
| Medical                                                                 | 76.5                   |
| <b>Financial characteristics</b>                                        |                        |
| CMS payments                                                            |                        |
| Medicare DSH payment, median \$                                         | N/A                    |
| Medicare DSH payment per \$1,000 of total operating expenses, median \$ | N/A                    |
| Received Medicaid DSH, %                                                | 51.2                   |
| Components of uncompensated and underreimbursed care                    |                        |
| Charity care per \$1,000 of total operating expenses, median \$         | 7.2                    |
| Bad debt expense per \$1,000 of total operating expenses, median \$     | 25.1                   |
| Unreimbursed cost per \$1,000 of total operating expenses, median \$    | 22.7                   |
| Profit margins                                                          |                        |
| Net profit margin, median %                                             | 3.2                    |
| Operating profit margin, median %                                       | -4.0                   |
| Value-based purchasing bonuses/penalty, %                               |                        |
| Bonus                                                                   | 0.0                    |
| No adjustment                                                           | 100.0                  |
| Penalty                                                                 | 0.0                    |
| Hospital readmission reduction program penalty, %                       |                        |
| High penalty ( $\geq 1\%$ , $\leq 3\%$ )                                | 0.0                    |
| Low penalty ( $< 1\%$ )                                                 | 0.0                    |
| No penalty                                                              | 100.0                  |

Abbreviations: AIDS, Acquired Immunodeficiency Syndrome; Centers for Medicare & Medicaid; DSH, Disproportionate Share Hospital; HIV, Human Immunodeficiency Virus; SNH, safety-net hospital.

<sup>a</sup> Source was the authors' analysis of the Healthcare Cost and Utilization Project State Inpatient Databases, Centers for Medicare & Medicaid Services Cost Reports, the American Hospital Association (AHA) Annual Survey, and Hospital Compare.

<sup>b</sup> Long-term acute care hospitals and hospitals that are not community nonrehabilitation hospitals. Bad debt includes non-Medicare and nonreimbursable Medicare bad debt. Unreimbursed costs include those from Medicaid, Children's Health Insurance Program, and county and state indigent care programs. Net profit margin calculated as net income or loss / (net patient revenue + total other income). Operating profit margin calculated as net patient revenue – total operating expenses + other operating income excluding government appropriations and unitemized miscellaneous income) / (net patient revenue + other operating income excluding government appropriations and unitemized miscellaneous income).
